# Supplementary material for: Na-X zeolite templated and sulfur-impregnated porous carbon as the cathode for a high-performance Li–S battery
Source: Royal Society of Chemistry journal article supplement (doi:10.1039/c5ra22992h), 2016-01-01
Supplement: c5ra22992h1.pdf [file c5ra22992h1.pdf]

## Electronic Supplementary Information

# Na-X Zeolite Templated and Sulfur-impregnated Porous Carbon as Cathode for High-performance Li-S Battery

*Yanhui Cui<sup>1</sup>, Jun Chen<sup>1</sup>, Kevin Huang<sup>2</sup>, Chenqiang Du<sup>3</sup>, Junwei Wu<sup>1\*</sup>, Andrew P. Baker<sup>1</sup>, Xinhe Zhang<sup>4</sup>*

1. Department of Materials Science and Engineering, Harbin Institute of Technology Shenzhen Graduate School, Shenzhen Key Laboratory of Advanced Materials, Shenzhen 518055, China. PR China. E-mail: [junwei.wu@hitsz.edu.cn](mailto:junwei.wu@hitsz.edu.cn)
2. Department of Mechanical Engineering, University of South Carolina, Columbia, SC 29201, USA.
3. Department of Applied Chemistry, Tianjin University, Tianjin 300072, China
4. Dongguan McNair Technology Co., Ltd, Dongguan City, Guangdong 523700, China

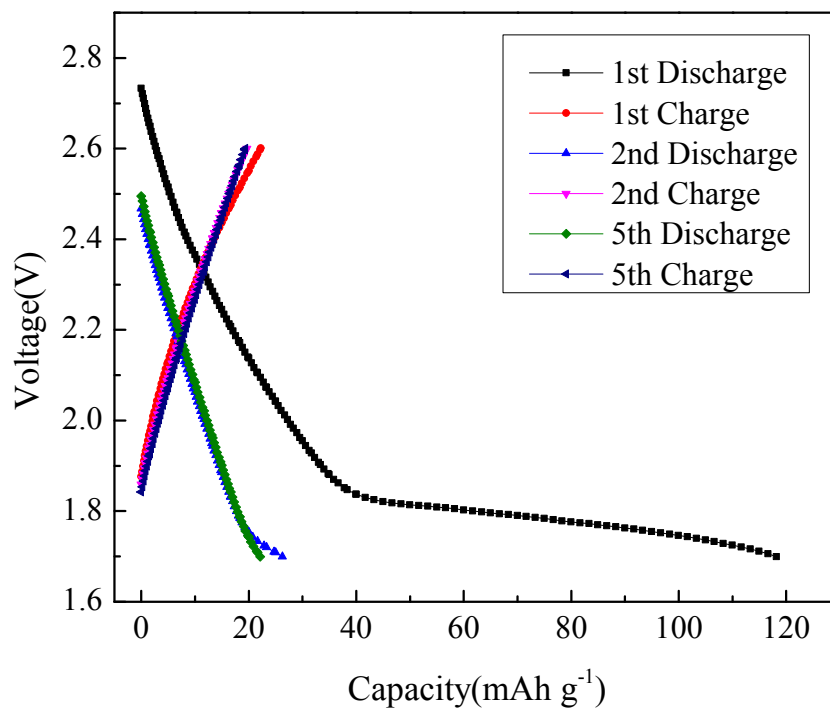

Fig. S1 The charge and discharge curves of the A-ZPC

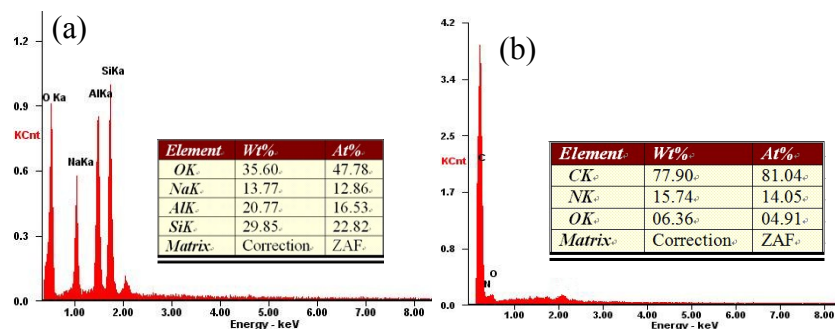

Fig. S2 The EDS spectrum of (a) nano Na-X zeolite and (b) A-ZPC

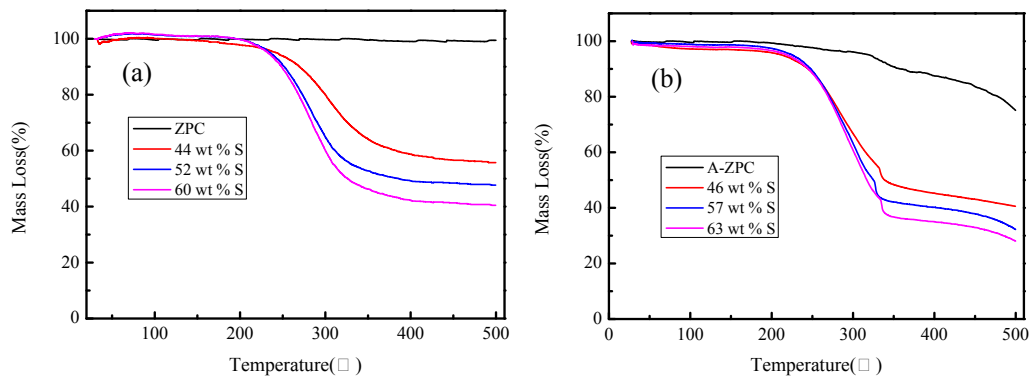

Fig. S3 The TG analysis of ZPC and ZPC-S composite (a) and A-ZPC and the A-ZPC-S composite (b)

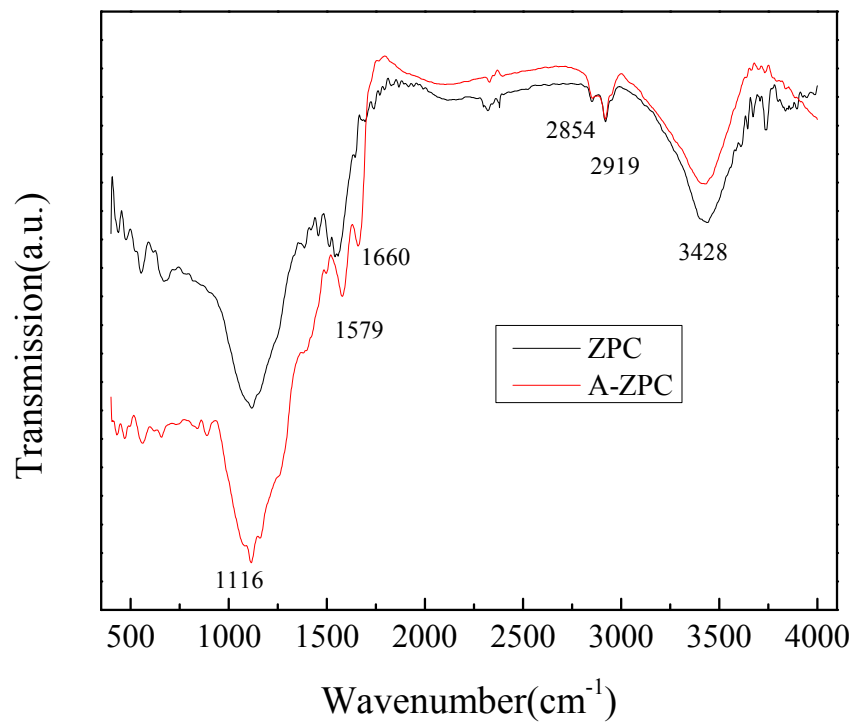

Fig. S4 The FTIR spectrum of ZPC and A-ZPC

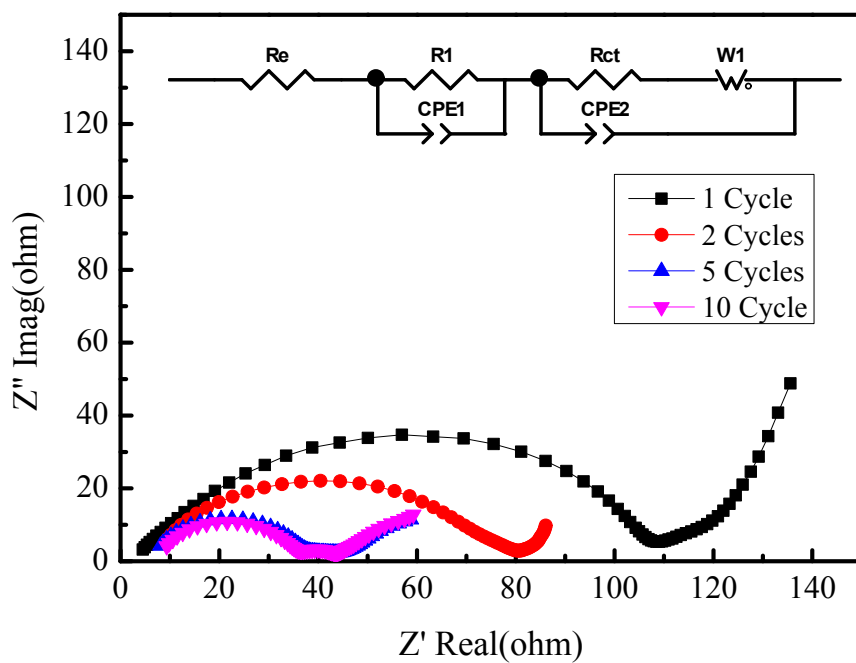

Fig. S5 Electrochemical impedance spectrum of A-ZPC-S composite with 63 wt% sulfur loading after different cycles at 0.2C

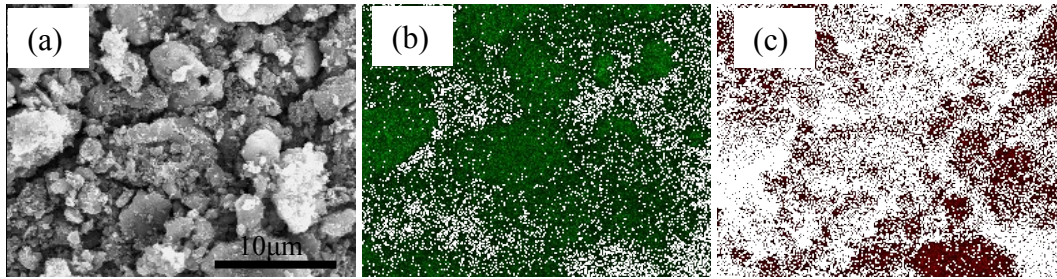

Fig. S6 The SEM image (a) of as-prepared A-ZPC-S composite with 46 wt% S and EDX element mappings of S (b) and C (c)

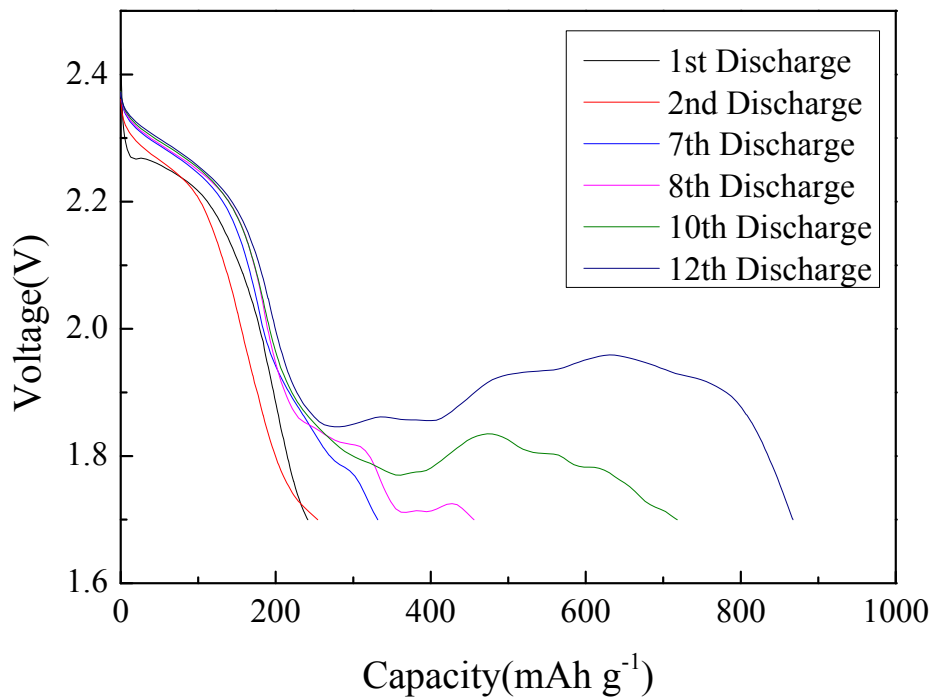

Fig. S7 The discharge curves of A-ZPC-S composite with 63 wt% S content at 0.5C between 1.7V and 2.6V

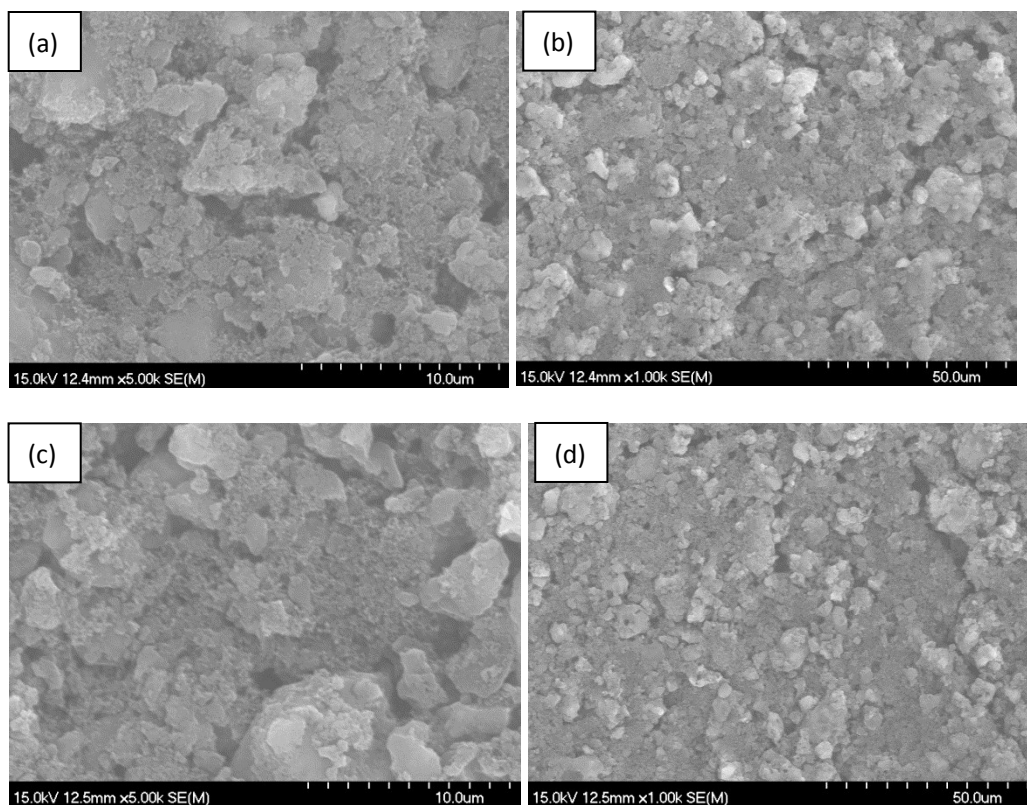

Fig. S8 SEM images of A-ZPC-S composite with 46 wt% S cathode (a)(b) before cycling and (c)(d) the cathode after 300 cycles at 1C

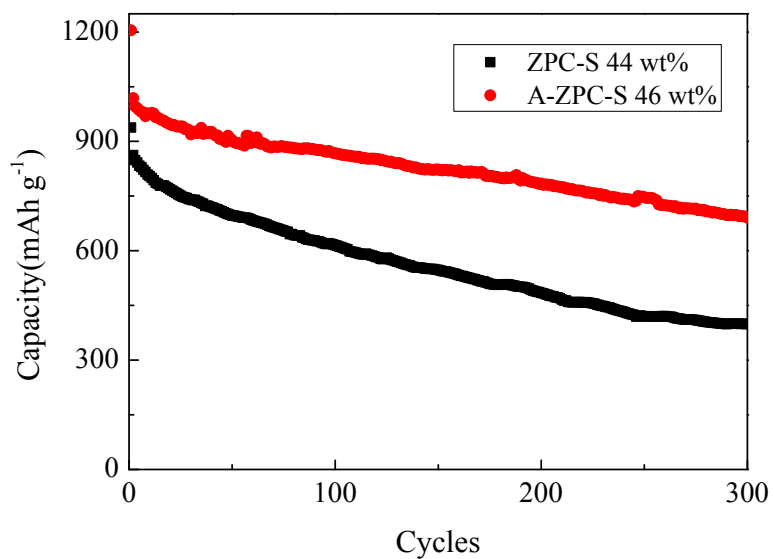

Fig. S9 The cycling performance of ZPC-S 44 wt% S and A-ZPC-S 46 wt% S at 1C

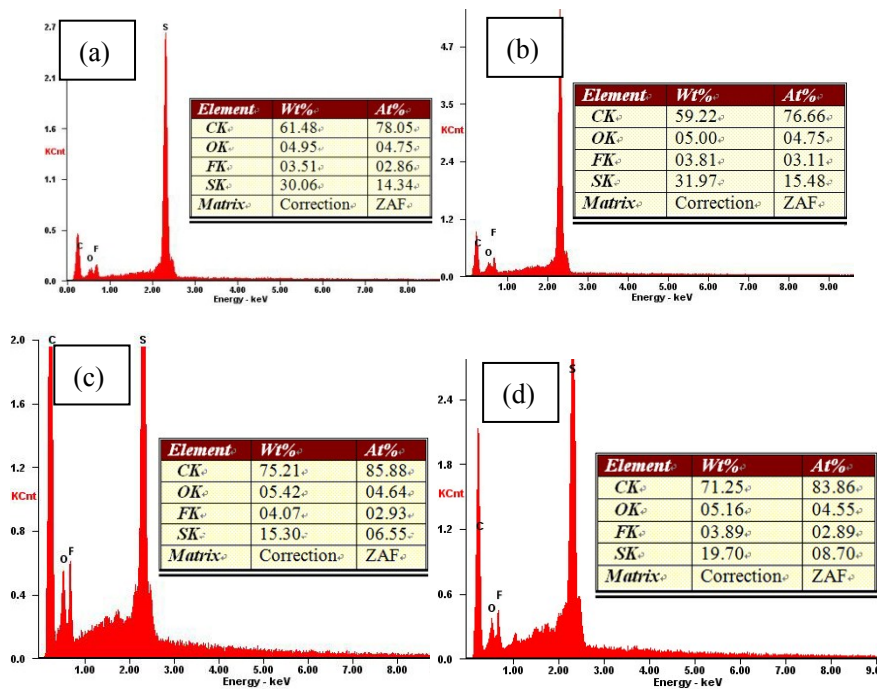

Fig. S10 The EDS of cathode (a)(b)ZPC-S 44 wt% S and (c)(d)A-ZPC-S 46 wt%:(a)(c)before cycling, (c)(d) after 300 cycling at 1C

Table S1 The surface area, pore volume and average pore size of zeolite, ZPC, A-ZPC and A-ZPC-S composite with different sulfur loading

| Material       | Surface Area (m <sup>2</sup> g <sup>-1</sup> ) | Pore volume (cm <sup>3</sup> g <sup>-1</sup> ) | Average Pore Size (Å g <sup>-1</sup> ) |
|----------------|------------------------------------------------|------------------------------------------------|----------------------------------------|
| Zeolite        | 537                                            | 0.3836                                         | 28.6                                   |
| ZPC            | 707.9                                          | 0.954                                          | 64.4                                   |
| A-ZPC          | 767.8                                          | 1.113                                          | 53.9                                   |
| S loaded A-ZPC | 46 wt.%                                        | 83.8                                           | 0.295                                  |
|                | 57 wt.%                                        | 45.6                                           | 0.086                                  |
|                | 63 wt.%                                        | 20.2                                           | 0.013                                  |

Table S2 The sulfur maintenance of ZPC-S cathode and A-ZPC-S cathode after 300 cycles at 1C

|         | 0 cycle | 300 cycles | Mass loss |
|---------|---------|------------|-----------|
| ZPC-S   | 30.06%  | 15.30%     | 49.1%     |
| A-ZPC-S | 31.97%  | 19.70%     | 38.38%    |
